# Supplementary material for: Dual-role ion dynamics in ferroionic CuInP2S6: revealing the transition from ferroelectric to ionic switching mechanisms
Source: PubMed Central journal article supplement — Nat Commun. 2024 Dec 30;15:10822. doi: 10.1038/s41467-024-55160-7 (PMC11685995; doi:10.1038/s41467-024-55160-7), 2024-12-30
Supplement: 41467_2024_55160_MOESM1_ESM.pdf [file 41467_2024_55160_MOESM1_ESM.pdf]

## Supplementary Materials for

### Dual-Role Ion Dynamics in Ferroionic CuInP<sub>2</sub>S<sub>6</sub>: Revealing the Transition from Ferroelectric to Ionic Switching Mechanisms

Xingan Jiang<sup>1#</sup>, Xiangping Zhang<sup>2#</sup>, Zunyi Deng<sup>3#</sup>, Jianming Deng<sup>4</sup>, Xiaolei Wang<sup>5†</sup>, Xueyun Wang<sup>3†</sup> and Weiyu Yang<sup>1†</sup>

<sup>1</sup>Institute of Micro/Nano Materials and Devices, Ningbo University of Technology, Ningbo City, 315211, P. R. China

<sup>2</sup>Department of Materials Science and Engineering, Southern University of Science and Technology, Shenzhen, Guangdong 518055, China

<sup>3</sup>School of Aerospace Engineering, Beijing Institute of Technology, Beijing, 100081, China

<sup>4</sup>Guangdong Provincial Key Laboratory of Electronic Functional Materials and Devices, Huizhou University, Huizhou, Guangdong, 516001, China

<sup>5</sup>School of Physics and Optoelectronic Engineering, Beijing University of Technology, Beijing 100124, China.

†Corresponding Authors Emails: xiaolei.wang@bjut.edu.cn; xueyun@bit.edu.cn; weiyuyang@tsinghua.org.cn

#These authors contribute equally to this work

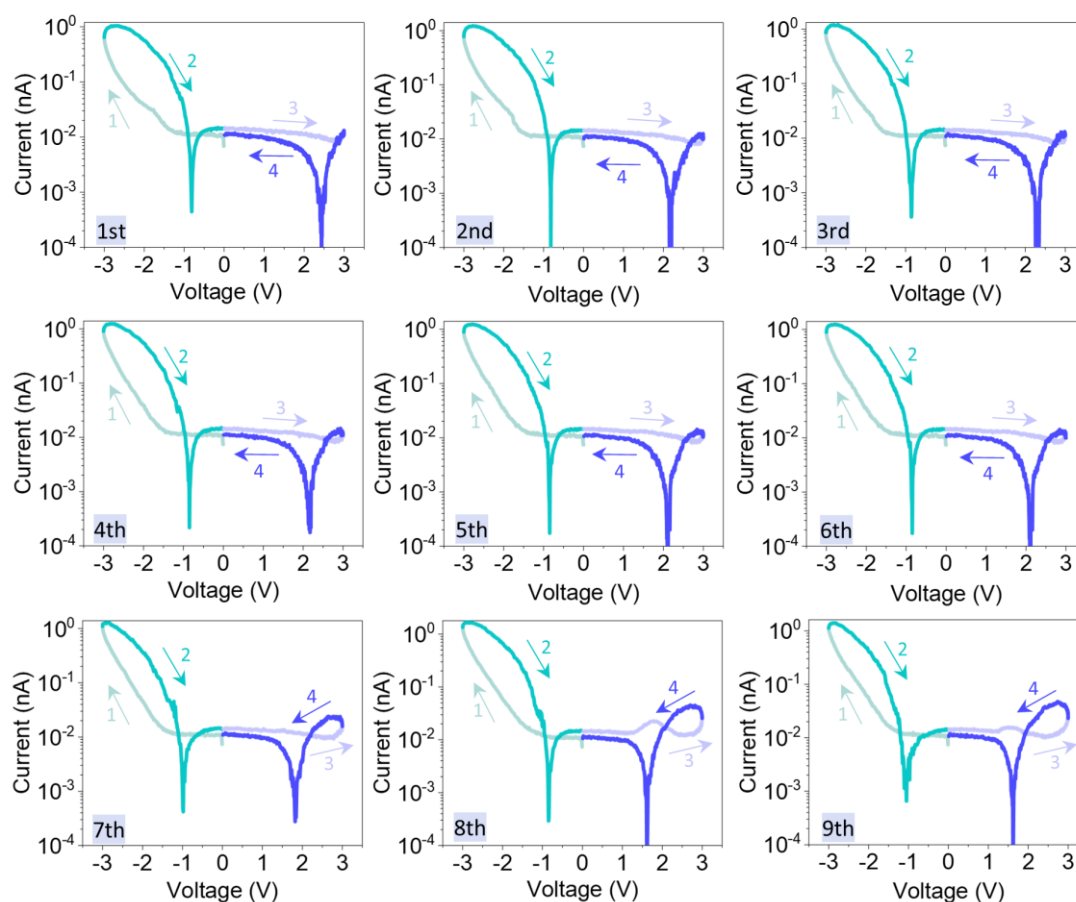

**Supplementary Fig. 1. The semilog  $I$ - $V$  curves using fast scans with a time duration of 1 s for each  $I$ - $V$  cycle. The raw  $I$ - $V$  data is adapted from our previous work<sup>1</sup> under a Creative Commons licence [CC BY 4.0](https://creativecommons.org/licenses/by/4.0/). With the increased cycles, the current under positive bias gradually increases and forms a visible current hysteresis window, indicating the activated Cu ion migration.**

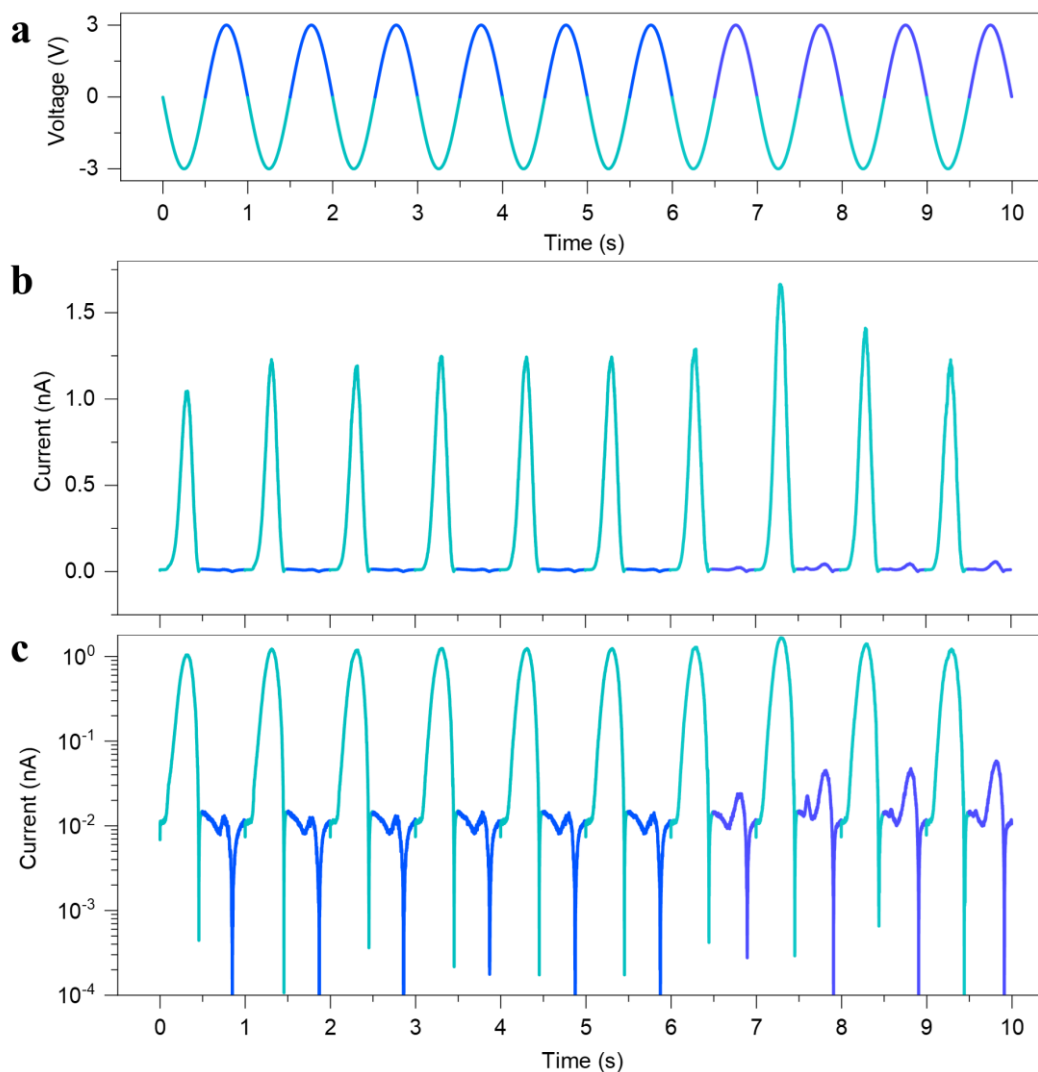

**Supplementary Fig. 2. The voltage-time ( $V-t$ ) and current-time ( $I-t$ ) curves for ten sinusoidal voltage sweeping, with a time duration of 1 s for each  $I-V$  cycle. The raw data is adapted from our previous work<sup>1</sup> under a Creative Commons licence [CC BY 4.0](https://creativecommons.org/licenses/by/4.0/). **a** The linear current -time curve. **b** The semilog current-time curve.**

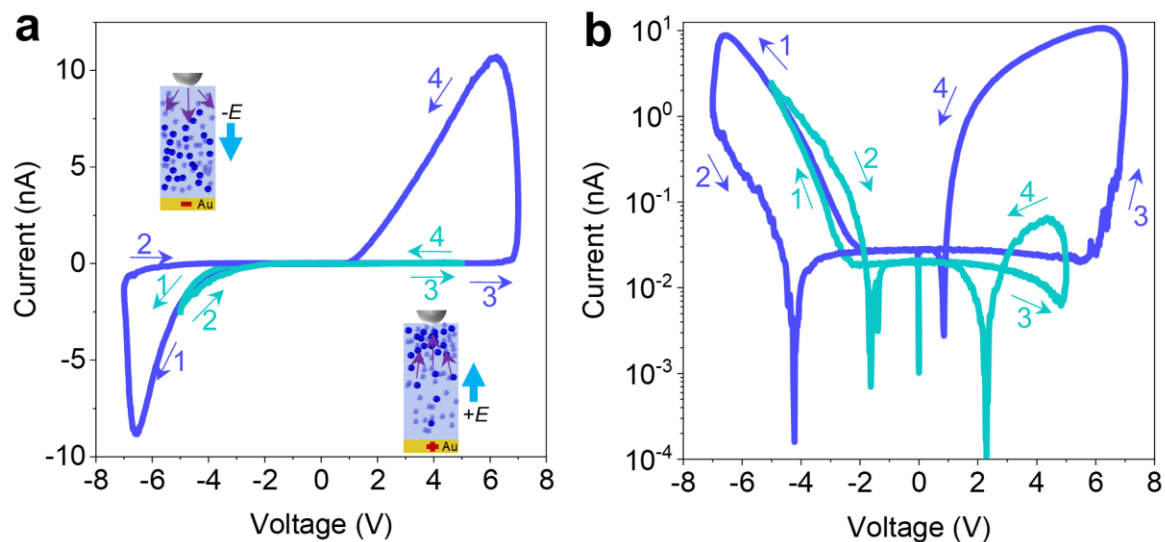

**Supplementary Fig. 3. The  $I$ - $V$  curves conducted at different bias voltage range with time duration of 1 s. **a** The linear plots of  $I$ - $V$  curves. The inset shows the accumulation and depletion of Cu ions under positive bias and negative bias, respectively. **b** The semilog plots of  $I$ - $V$  curves. The number #1-4 and the arrow represents the bias voltage sweeping sequence.**

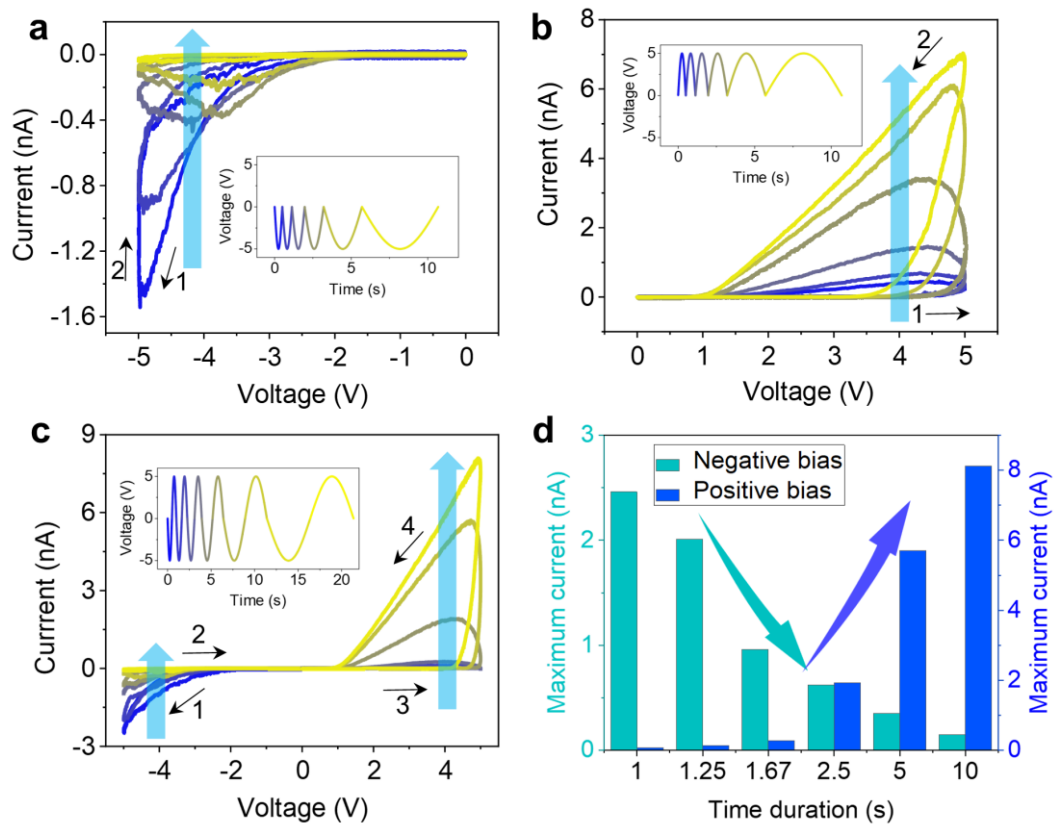

**Supplementary Fig. 4. The semi-cycle and full cycle of  $I-V$  curves conducted using six sinusoidal voltage sweeping with different time duration. a-b** The six semi-cycle of  $I-V$  curves in **(a)** negative and **(b)** positive bias direction with the varied time duration ranging from 0.5 s to 5 s for each semi-cycle, respectively. **c** The six full-cycle of  $I-V$  curves in two bias direction with the varied time duration ranging from 1 to 10 s for each full-cycle. **d** The maximum current change with the cycles with the varied time duration in two opposite bias direction.

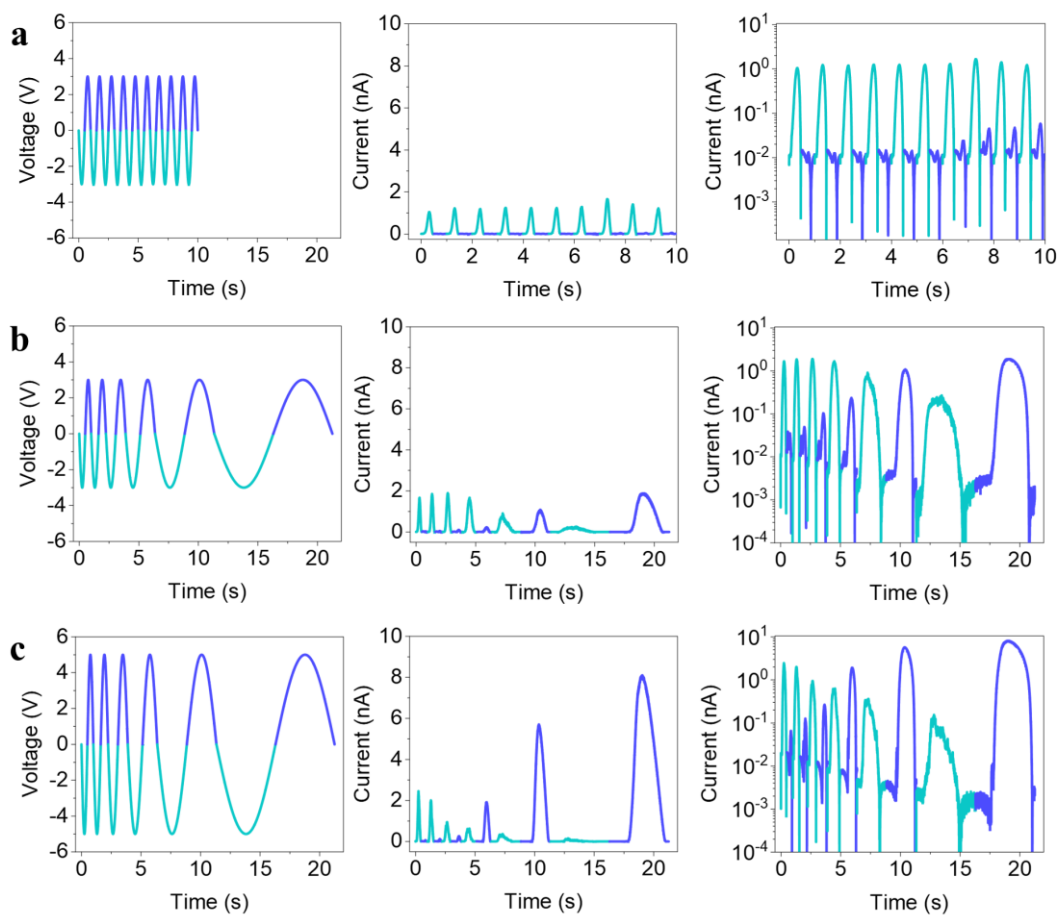

**Supplementary Fig. 5. Sinusoidal voltage sweeping cycles and the corresponding current under different bias conditions.** The raw data in panel **a** and **b** is adapted from our previous work<sup>1</sup> under a Creative Commons licence [CC BY 4.0](https://creativecommons.org/licenses/by/4.0/). **a** Ten sinusoidal voltage sweeping cycles with a maximum voltage  $V_{max}=3$  V and time duration of 1 s for each cycle, and the corresponding current. **b** Six sinusoidal voltage sweeping cycles with  $V_{max}=3$  V and the time duration varying from 1 s to 10 s for each cycle, and the corresponding current. **c** Six sinusoidal voltage sweeping cycles with  $V_{max}=5$  V and time duration varying from 1 s to 10 s for each cycle, and the corresponding current.

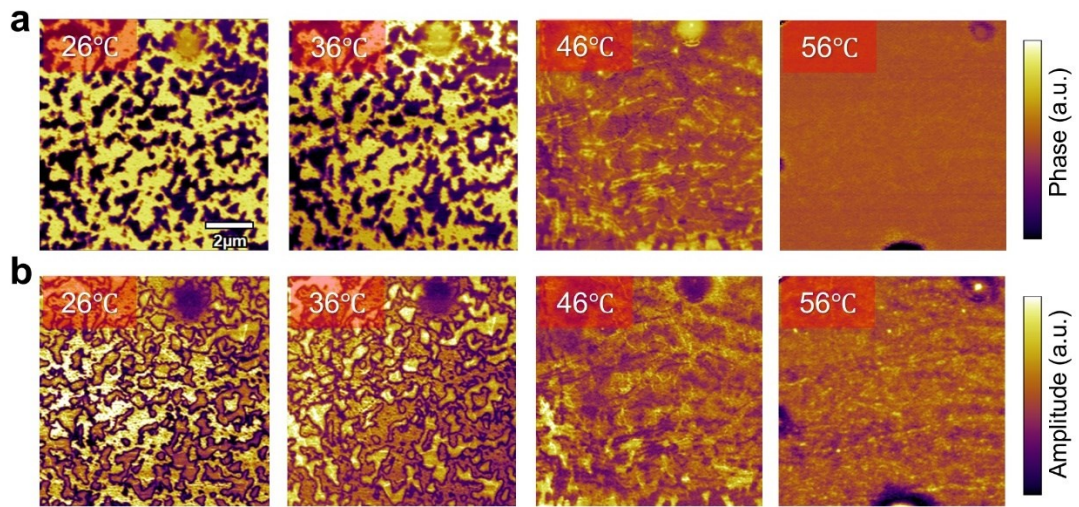

**Supplementary Fig. 6. The in-situ variable temperature PFM images. a-b** The phase and amplitude at four set of temperatures (26 °C, 36 °C, 46 °C, and 56 °C), respectively. When the temperature exceeds 46 °C, ferroelectricity begins to rapidly disappear.

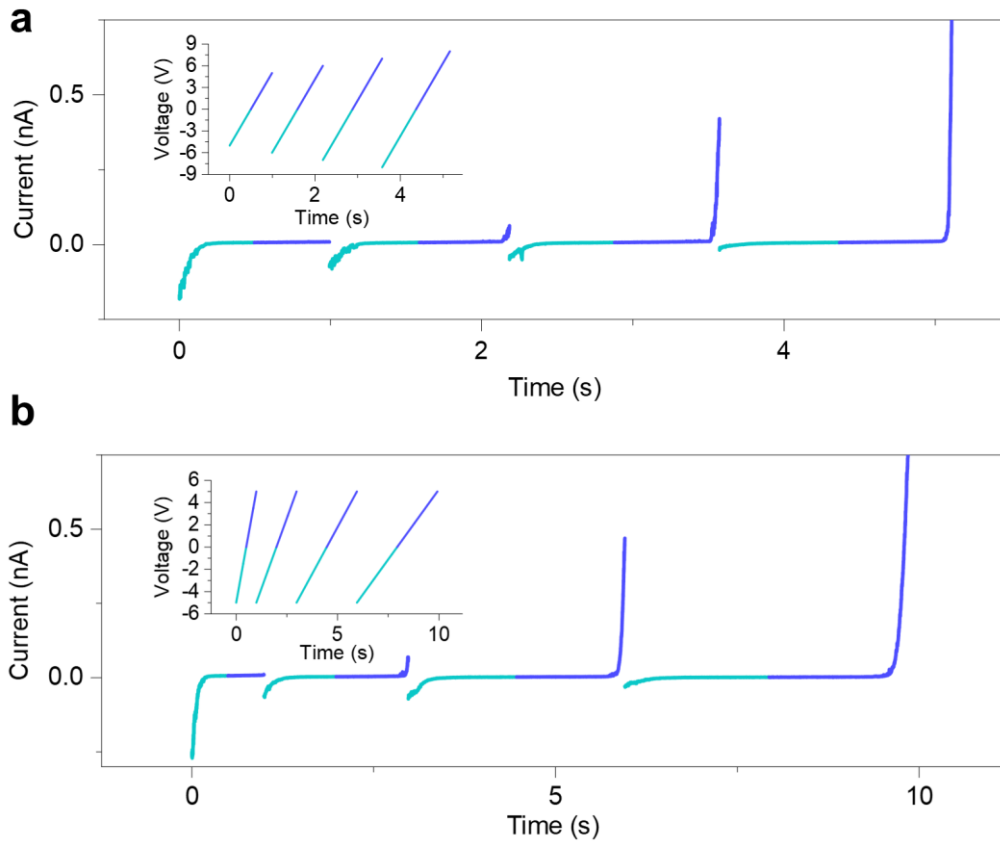

**Supplementary Fig. 7. Reversed current rectification with increased bias voltage magnitude and longer time duration. a** The varied bias voltage magnitude with  $V_{\max}$  ranging from 5 V to 8 V and time duration is 1 s for each cycle, and the corresponding current. **b** The varied time duration ranging from 1 s to 4 s for each  $I$ - $V$  curve with  $V_{\max}=5$  V, and the corresponding current.



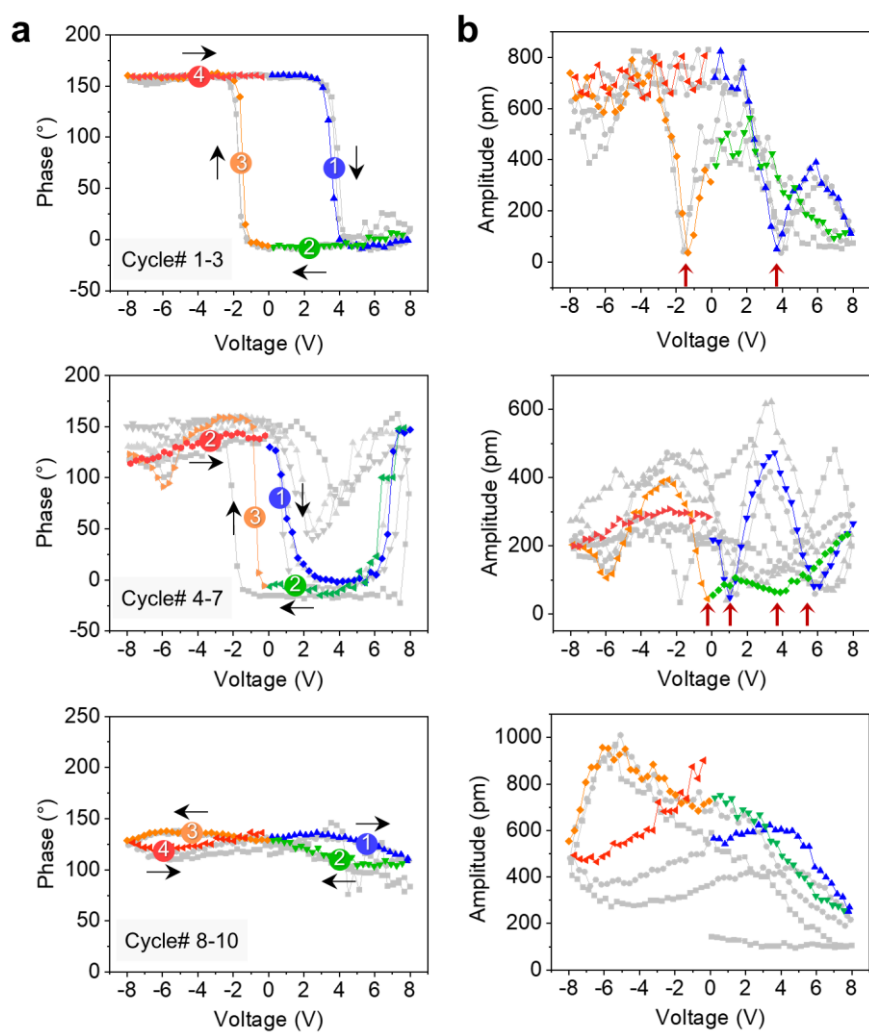

**Supplementary Fig. 8. Ten SS-PFM performed at a specific location with time duration of 1 s for each  $I$ - $V$  cycle. a, b** The phase and amplitude at different test cycles, respectively. The numbers#1-4 and black arrows represent the bias scanning sequence and direction, respectively.

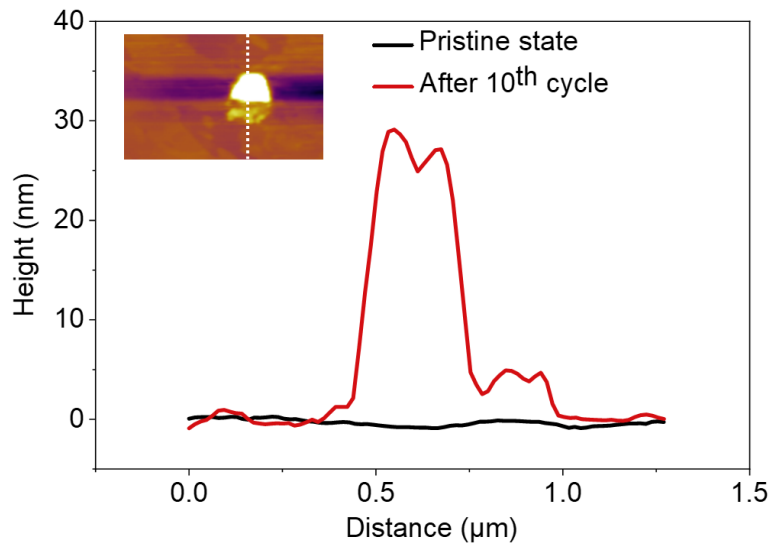

**Supplementary Fig. 9. The topography height changes before and after ten SS-PFM measurements performed at a specific location.** The long-range migration across the vdW gap significantly disrupts the ferroelectric order, which is further confirmed by the formation of topographic bulges up to 30 nm after 10 cycles.

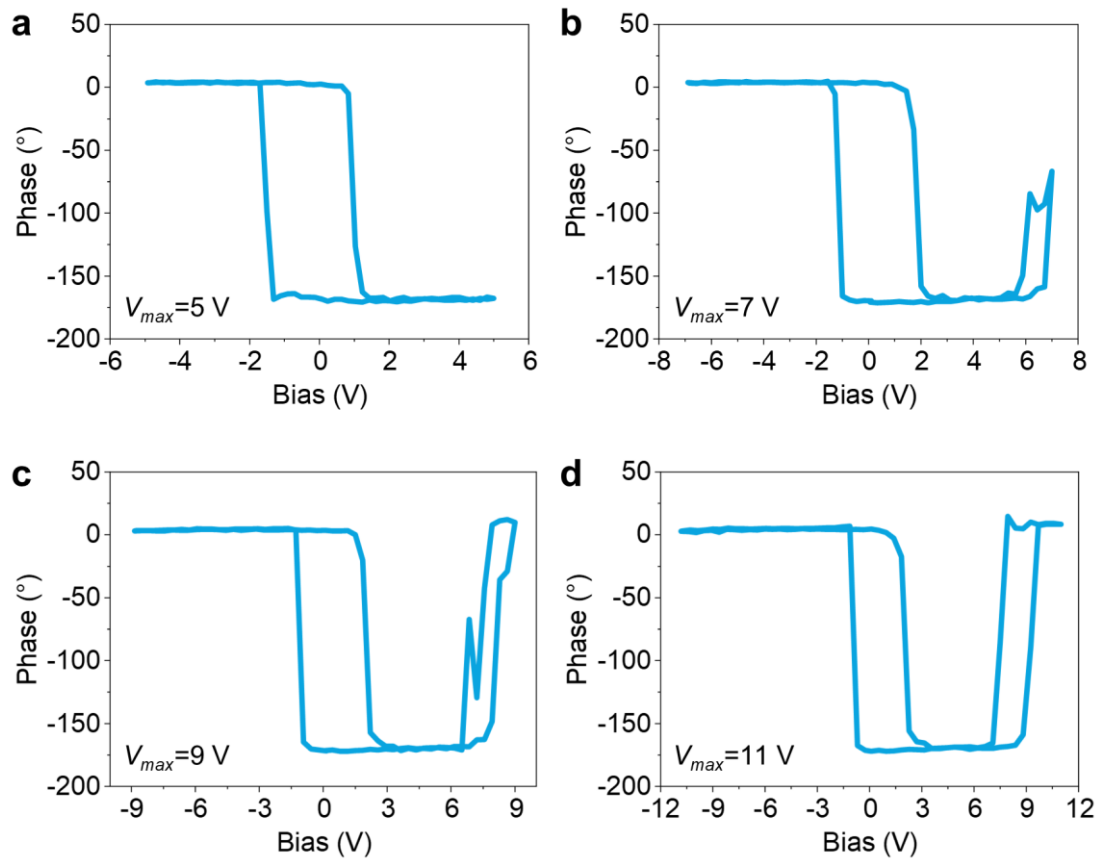

**Supplementary Fig. 10. The abnormal switching behaviors modulated by tuning the bias magnitude.** **a-d** The SS-PFM loop measured at different  $V_{max}$ , corresponding to  $V_{max}=5$  V,  $V_{max}=7$  V,  $V_{max}=9$  V, and  $V_{max}=11$  V, respectively. The time duration for each loop is 1 s.

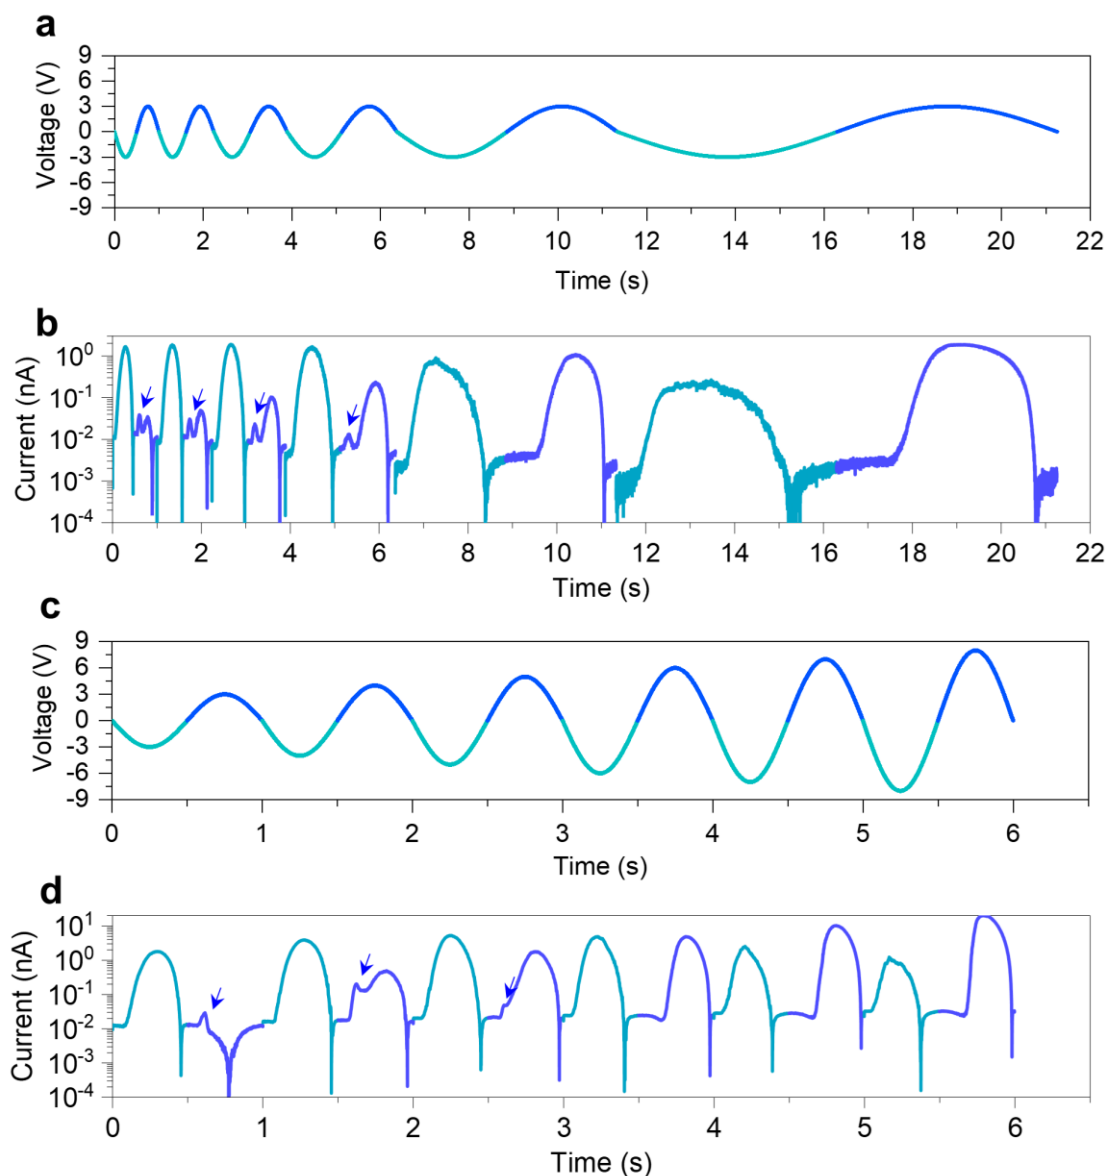

**Supplementary Fig. 11. Six sinusoidal voltage sweeping cycles and the corresponding current versus the time duration for six cycles under different bias condition.** The raw data is adapted from our previous work<sup>1</sup> under a Creative Commons licence [CC BY 4.0](https://creativecommons.org/licenses/by/4.0/). **a-b** Six sinusoidal voltage sweeping cycles with the varied time duration ranging from 1 s to 10 s and the corresponding current. **c-d** Six sinusoidal voltage sweeping cycles with a time duration of 1 s and the varied bias voltage magnitude ranging from 3 V to 8 V and the corresponding current.

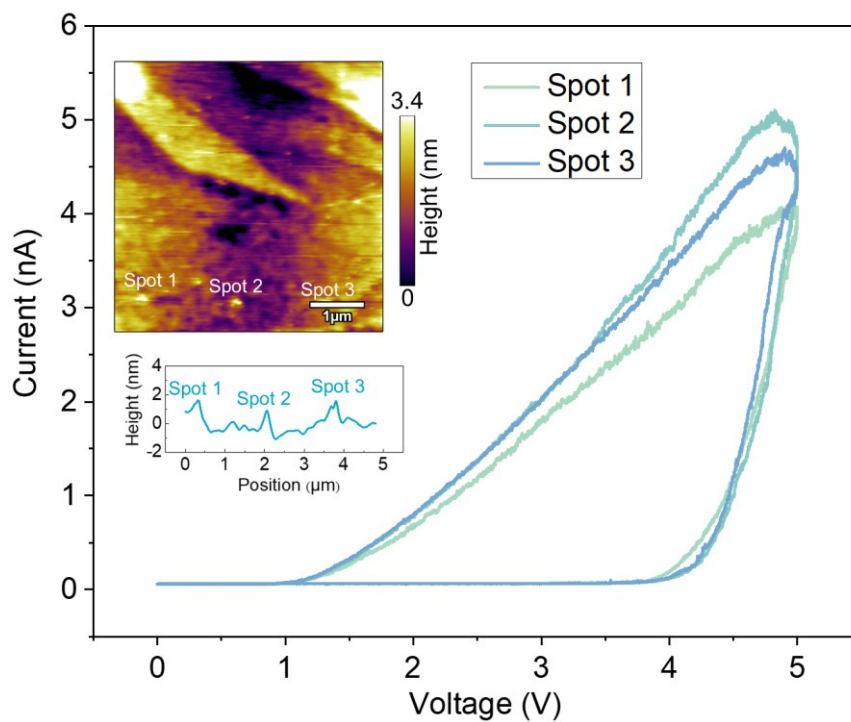

**Supplementary Fig. 12.** The semi-cycle of I-V curves measured by the sequence of (0 V  $\rightarrow$  +5 V  $\rightarrow$  0 V) at three different positions and the topographic changes. A slightly topographic bump ( $\sim 2$  nm) appears due to the long-range migration and redistribution of  $\text{Cu}^+$  ions.

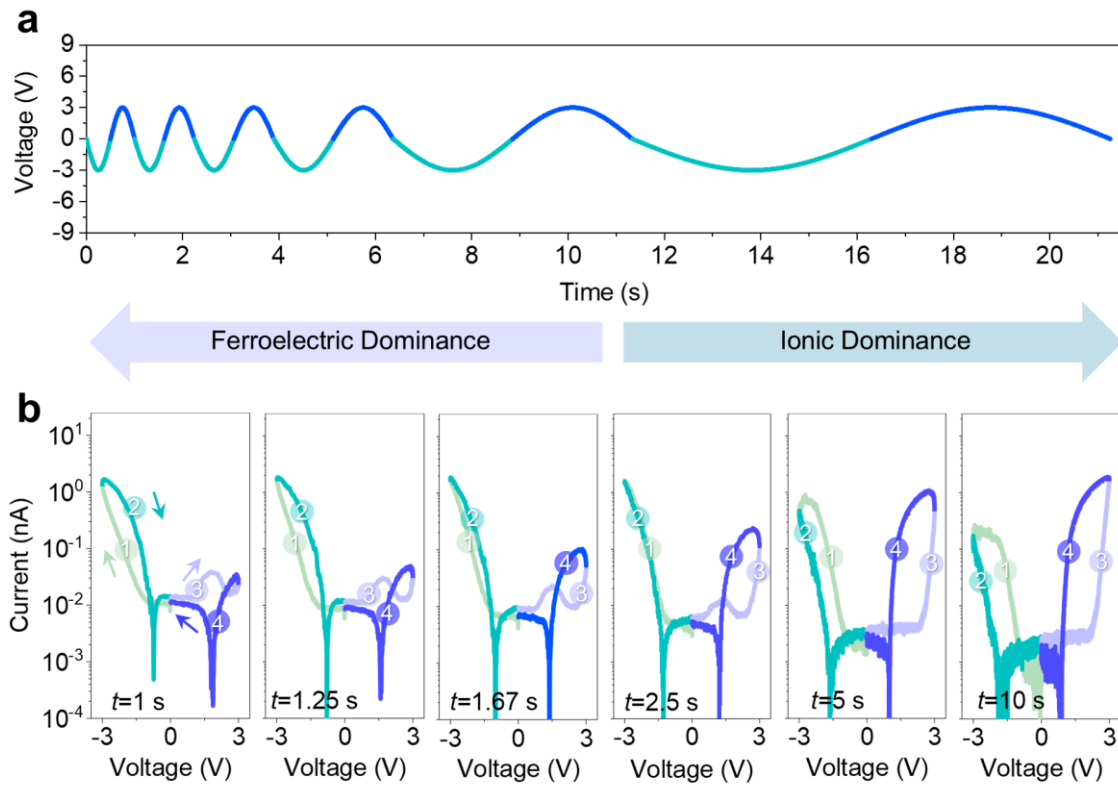

**Supplementary Fig. 13. Six sinusoidal voltage sweeping cycles with the varied time duration for each cycle and the corresponding six full-cycle of semilog  $I-V$  curves.** The raw data is adapted from our previous work<sup>1</sup> under a Creative Commons licence [CC BY 4.0](https://creativecommons.org/licenses/by/4.0/). **a** Six sinusoidal voltage sweeping cycles and the corresponding time duration varies from 1 s to 10 s for each cycle. **b** The corresponding six full-cycle of semilog  $I-V$  curves as the time duration varies from 1 s to 10 s.

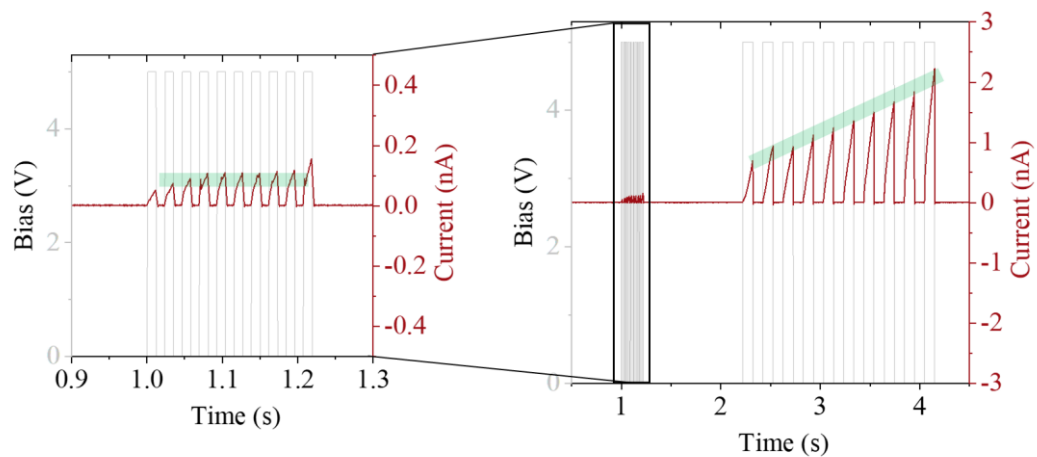

**Supplementary Fig. 14. The current in response to two different pulse conditions.** The current was measured in response to ten consecutive 5 V pulse cycles with pulse widths of 0.01 s and 0.1 s, respectively.

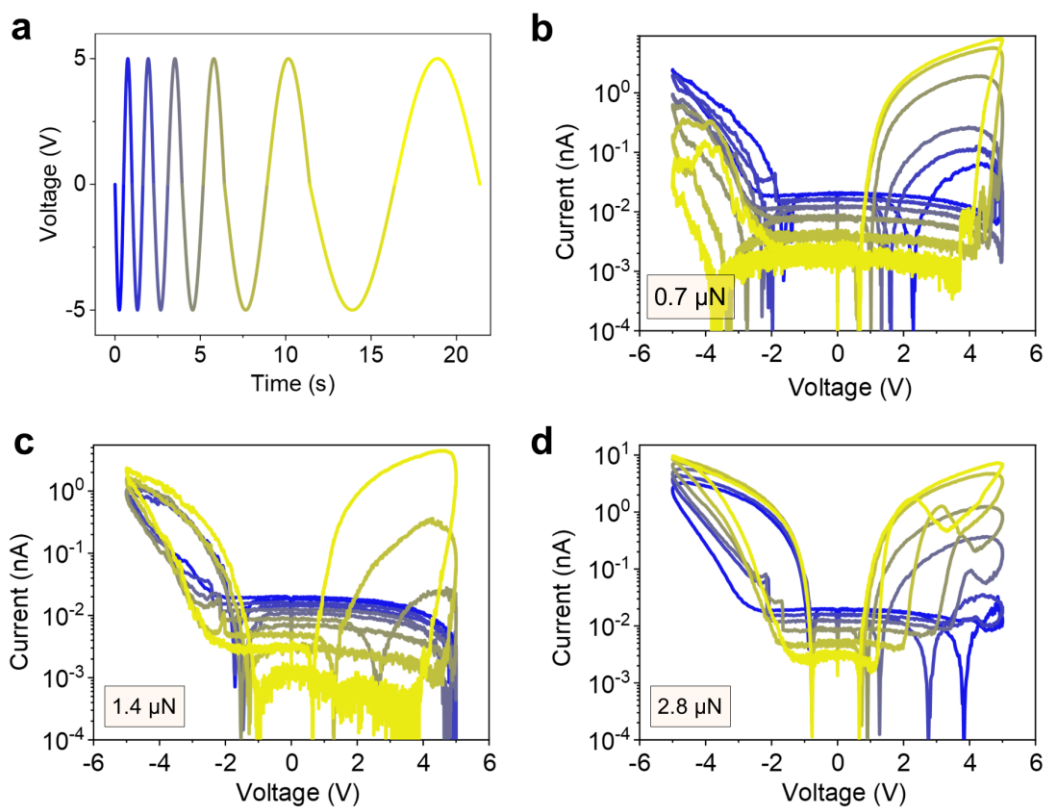

**Supplementary Fig. 15. Six sinusoidal voltage sweeping cycles with the varied time duration for each cycle and the corresponding six full-cycle of semilog  $I$ - $V$  curves at different tip force. a** Six sinusoidal voltage sweeping cycles and the corresponding time duration varies from 1 s to 10 s for each cycle. **b-d** The six full-cycle of semilog  $I$ - $V$  curves under 0.7  $\mu\text{N}$ , 1.4  $\mu\text{N}$  and 2.8  $\mu\text{N}$ , respectively.



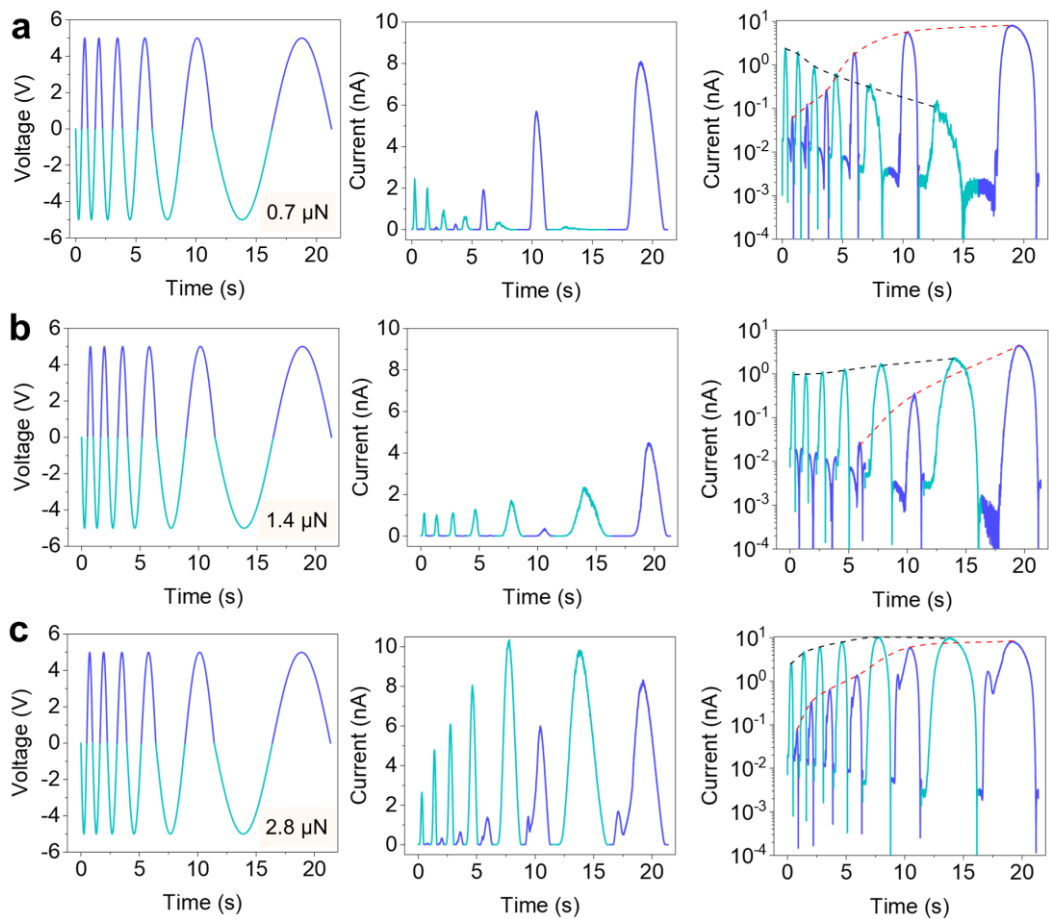

**Supplementary Fig. 16. Six sinusoidal voltage sweeping cycles with the varied time duration for each cycle under three different tip forces and the corresponding current. a-c** Six voltage sweeping cycles with the varied time duration from 1 s to 10 s and the corresponding current under **(a)** 0.7  $\mu\text{N}$ , **(b)** 1.4  $\mu\text{N}$ , and **(c)** 2.8  $\mu\text{N}$ , respectively.

**Supplementary Table 1. Lattice parameters ( $a$ ,  $b$ ,  $c$  and  $\beta$ ) and lattice volume  $V$  of bulk CIPS calculated with various exchange-correlation functionals.** Experimental and other theoretical lattice parameters at 295 K are also listed for comparison.

| Methods                     | $a$ (Å) | $b$ (Å) | $c$ (Å) | $\beta$ (°) | $V$ (Å <sup>3</sup> ) |
|-----------------------------|---------|---------|---------|-------------|-----------------------|
| PBE+DFT-D2                  | 6.091   | 10.546  | 13.788  | 107.27      | 845.77                |
| PBE+DFT-D3(0)               | 6.108   | 10.580  | 13.835  | 107.21      | 854.05                |
| PBE+DFT-D3(BJ)              | 6.070   | 10.512  | 13.543  | 107.34      | 824.35                |
| PBEsol+DFT-D2               | 5.979   | 10.341  | 13.197  | 107.69      | 777.36                |
| PBEsol+DFT-D3(0)            | 6.015   | 10.415  | 13.386  | 107.41      | 800.22                |
| PBEsol+DFT-D3(BJ)           | 5.971   | 10.352  | 12.974  | 107.10      | 766.55                |
| PBE+DFT-D3(BJ) <sup>2</sup> | 6.068   | 10.510  | 13.510  | 107.34      | 822.4                 |
| Exp. (295 K) <sup>3</sup>   | 6.0956  | 10.5645 | 13.6230 | 107.101     | 838.5                 |

## References

1. Jiang, X. *et al.* Manipulation of current rectification in van der Waals ferroionic CuInP<sub>2</sub>S<sub>6</sub>. *Nat. Commun.* **13**, 574 (2022).
2. Zhang, X. *et al.* Origin of versatile polarization state in CuInP<sub>2</sub>S<sub>6</sub>. *Phy. Rev. B* **108**, L161406 (2023).
3. Maisonneuve, V. *et al.* Ferrielectric ordering in lamellar CuInP<sub>2</sub>S<sub>6</sub>. *Phy. Rev. B* **56**, 10860 (1997).
